# Supplementary material for: Synthesis of homogeneous sphere-like Bi2WO6nanostructure by silica protected calcination with high visible-light-driven photocatalytic activity under direct sunlight
Source: Royal Society of Chemistry journal article supplement (doi:10.1039/c4ce01839g), 2014-11-28
Supplement: c4ce01839g1.pdf [file c4ce01839g1.pdf]

## Electronic Supplementary Information

### Synthesis of homogeneous sphere-like $\text{Bi}_2\text{WO}_6$ nanostructure based on silica protected calcination with high visible-light-driven photocatalytic activity under direct sunlight

**Thillai Sivakumar Natarajan**<sup>a, b</sup>, **Hari C. Bajaj**<sup>a, b, \*</sup> and **Rajesh J. Tayade**<sup>a \*</sup>

<sup>a</sup>*Discipline of Inorganic Materials and Catalysis (DIMC), CSIR-Central Salt and Marine Chemicals Research Institute (CSIR-CSMCRI), Council of Scientific and Industrial Research (CSIR), Gijubhai Badheka Marg, Bhavnagar - 364 002, Gujarat, India.*

<sup>b</sup>*Academy of Scientific and Innovative Research (AcSIR), CSIR-Central Salt and Marine Chemicals Research Institute (CSIR-CSMCRI), Gijubhai Badheka Marg, Bhavnagar 364 002, Gujarat, India.*

---

\*Corresponding author: **Dr. Rajesh J. Tayade**

Fax: +91 278 2567562 / 2566970. Tel.: +91 278 2567760. Ext: 7180

E-mail address: [tayade@csmcri.org](mailto:tayade@csmcri.org), [rtayade@gmail.com](mailto:rtayade@gmail.com)

**Table S1** The molecular structure and chemical properties of Reactive black 5 dye

| Molecular structure     | Chemical properties |                                |
|-------------------------|---------------------|--------------------------------|
|                         | Chemical formula    | $C_{26}H_{21}N_5Na_4O_{19}S_6$ |
|                         | Molecular weight    | 991.82 g/mol                   |
|                         | Absorption maximum  | 597 nm                         |
|                         | Class               | Diazo                          |
| <b>Reactive black 5</b> |                     |                                |

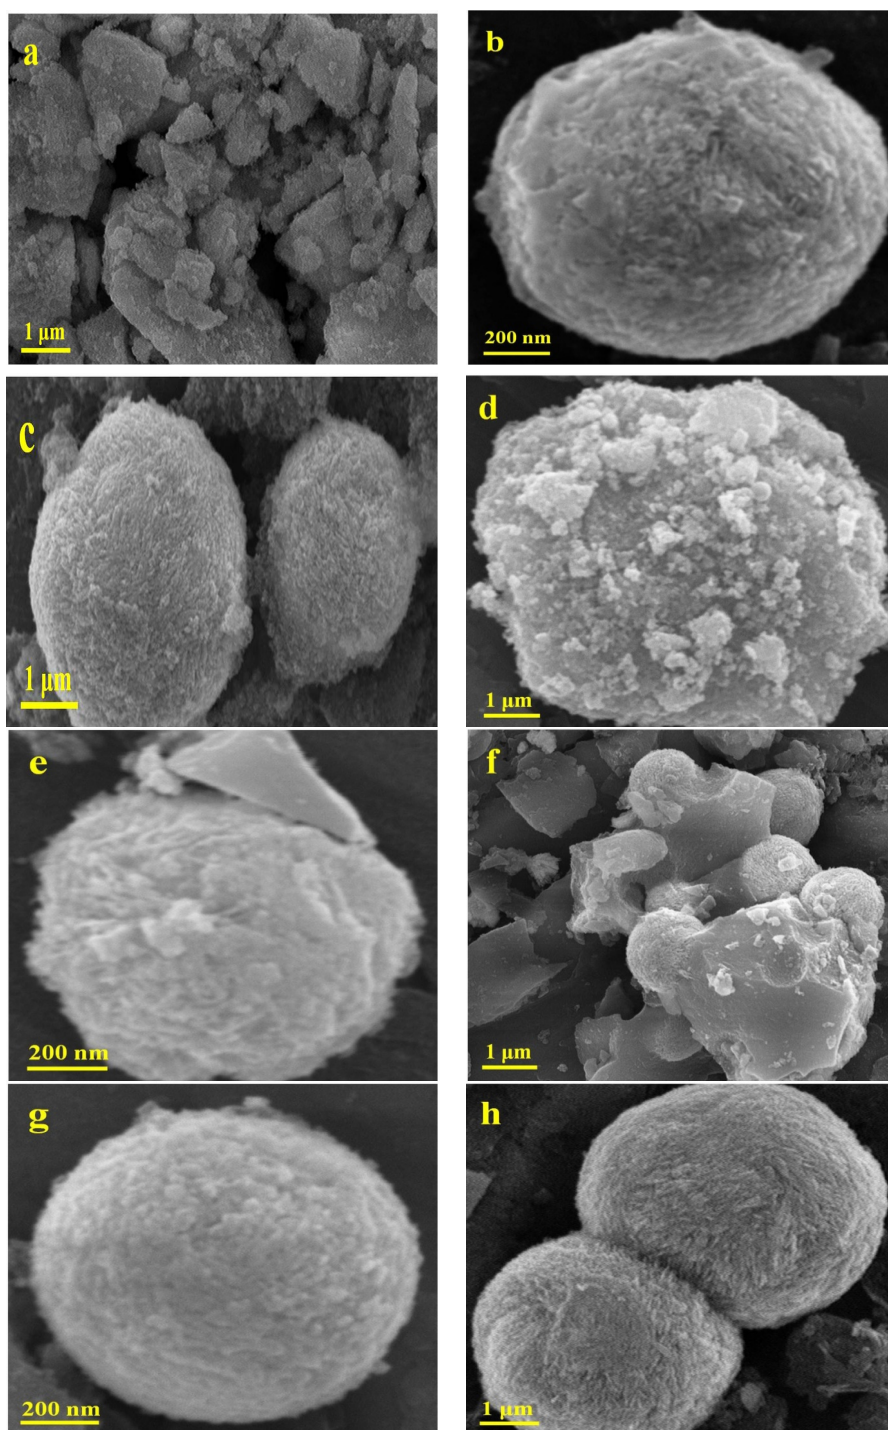

**Fig. S1** SEM image of  $\text{Bi}_2\text{WO}_6$  sphere prepared at different hydrothermal time (a) BW-S-BC-0.5 h, (b) BW-S-BC-3 h, (c) BW-S-BC-12 h, (d) BW-S-BSE-0.5 h, (e) BW-S-BSE-1 h, (f) BW-S-BSE-2 h, (g) BW-S-BSE-3 h and (h) BW-S-BSE-12 h.

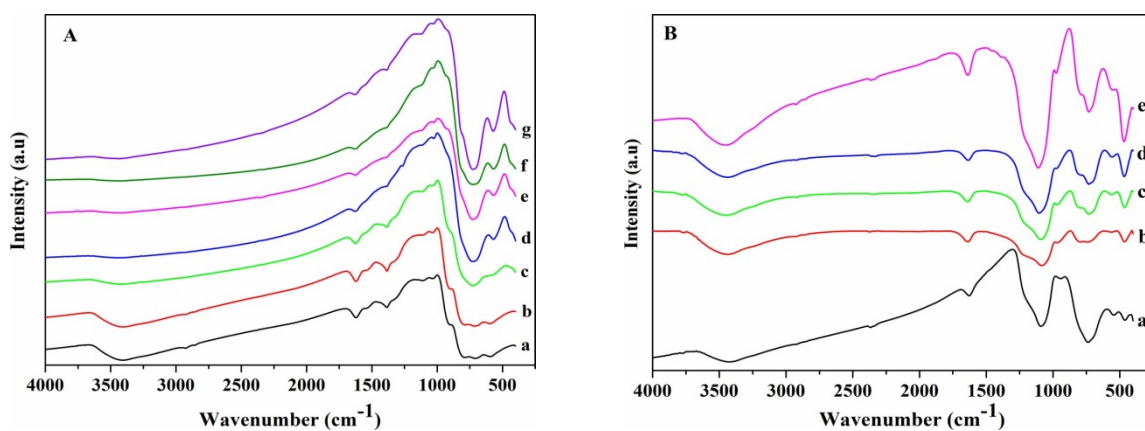

**Fig. S2** FT-IR spectra of  $\text{Bi}_2\text{WO}_6$  flower and  $\text{SiO}_2@\text{BiWO}_6$  sphere samples synthesised at different hydrothermal time (A) BW-F-x (a-0.5 h, b-1 h, c-1.5 h, d-2 h, e-3 h, f-6 h and g-12 h), (B) BW-S-BSE-x (a-0.5 h, b-1 h, c-2 h, d-3 h and e-12 h).

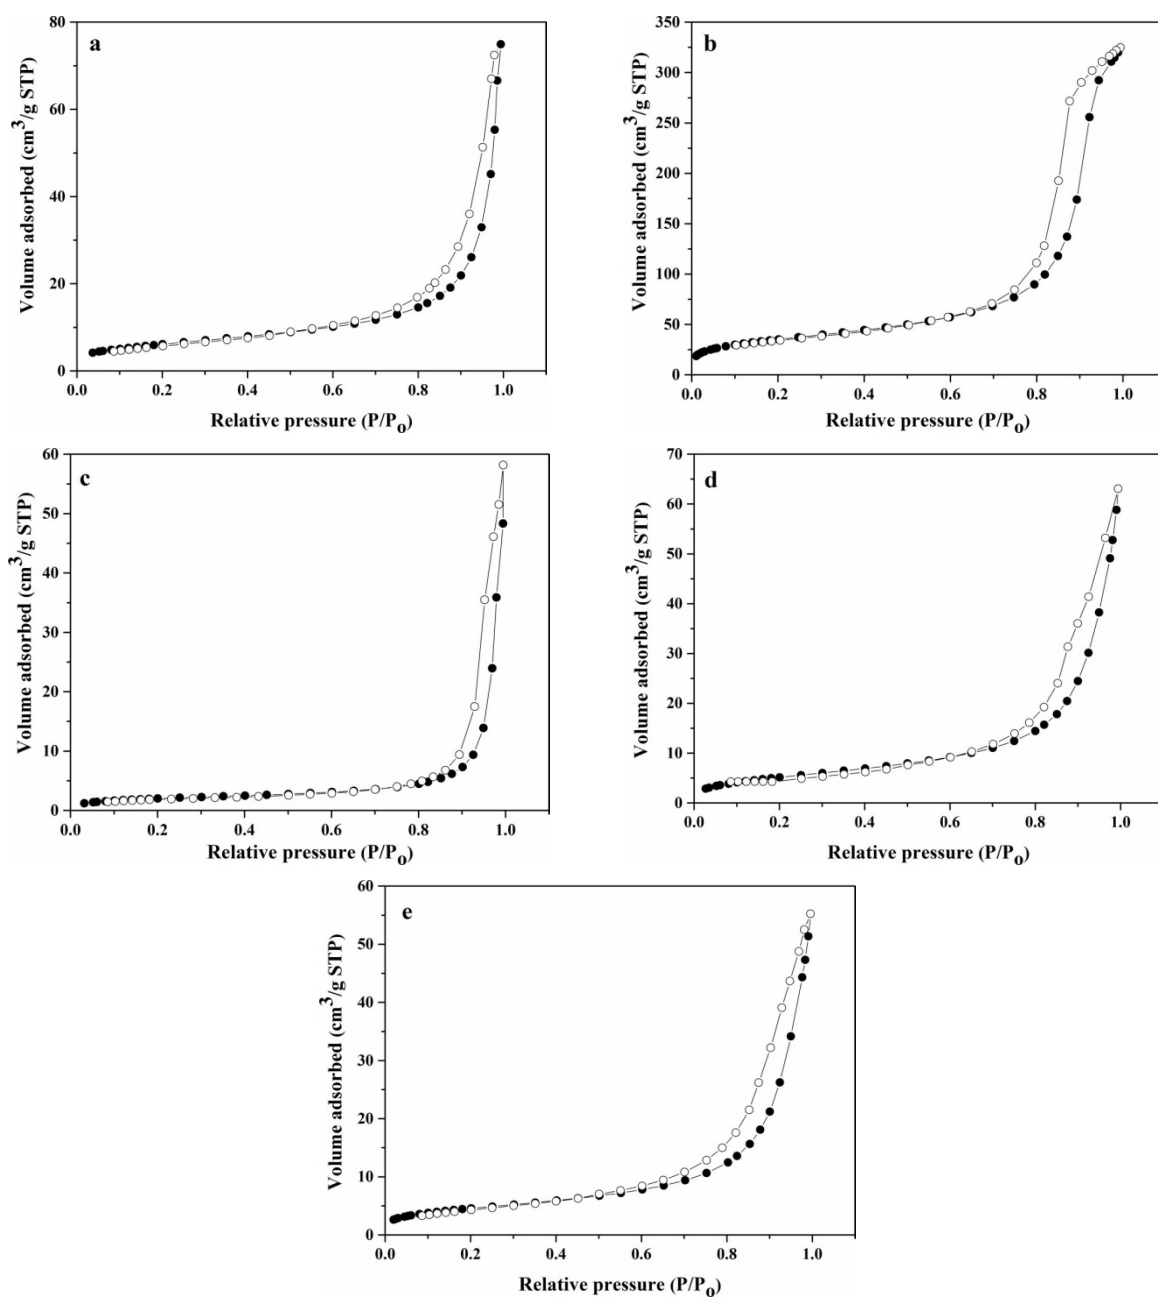

**Fig.S3**  $N_2$  adsorption and desorption isotherm plot of (a) BW-F-12 h, (b) BW-S-BSE-12 h, (c) BW-S-ASE-0.5 h, (d) BW-S-ASE-1 h and (e) BW-S-ASE-1.5 h at 77 K. (solid circle-adsorption branch; open circle-desorption branch).

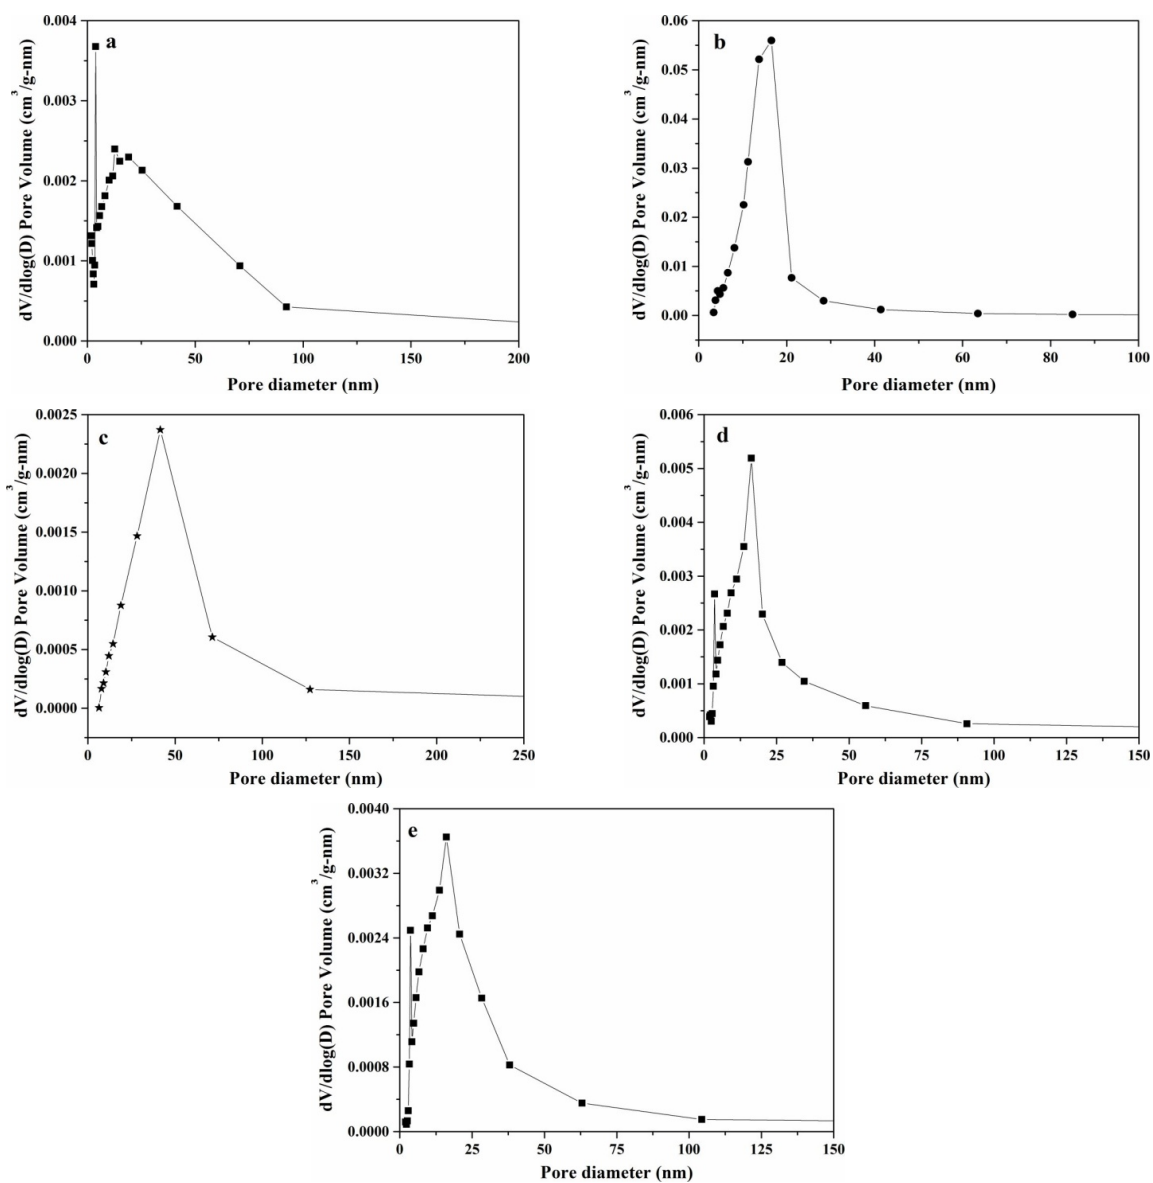

**Fig. S4** Pore size distribution of (a) BW-F-12 h, (b) BW-S-BSE-12 h, (c) BW-S-ASE-0.5 h, (d) BW-S-ASE-1 h and (e) BW-S-ASE-1.5 h.

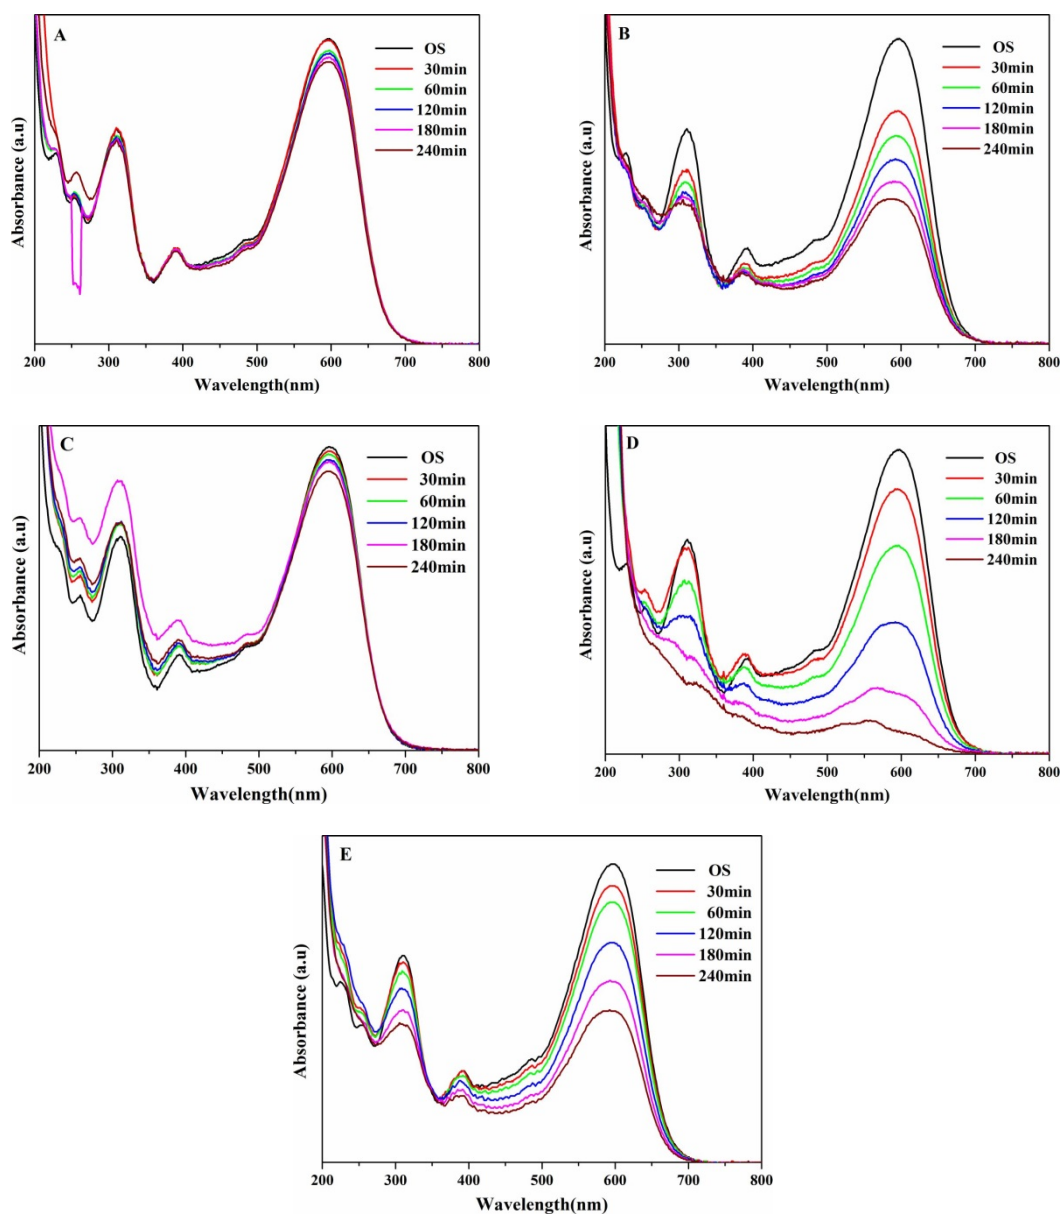

**Fig. S5** UV-visible degradation profile of RB5 dye degradation using (A) blank, (B) BW-F-12 h, (C) BW-S-BSE-12 h, (D) BW-S-ASE-0.5 h and (E) BW-S-ASE-1.5 h photocatalyst under direct sunlight irradiation.
